# Supplementary figures and images for: A Network-Based Approach for Identification of Subtype-Specific Master Regulators in Pancreatic Ductal Adenocarcinoma
Source: MDPI journal article supplement (doi:10.3390/genes11020155), 2020-02-01

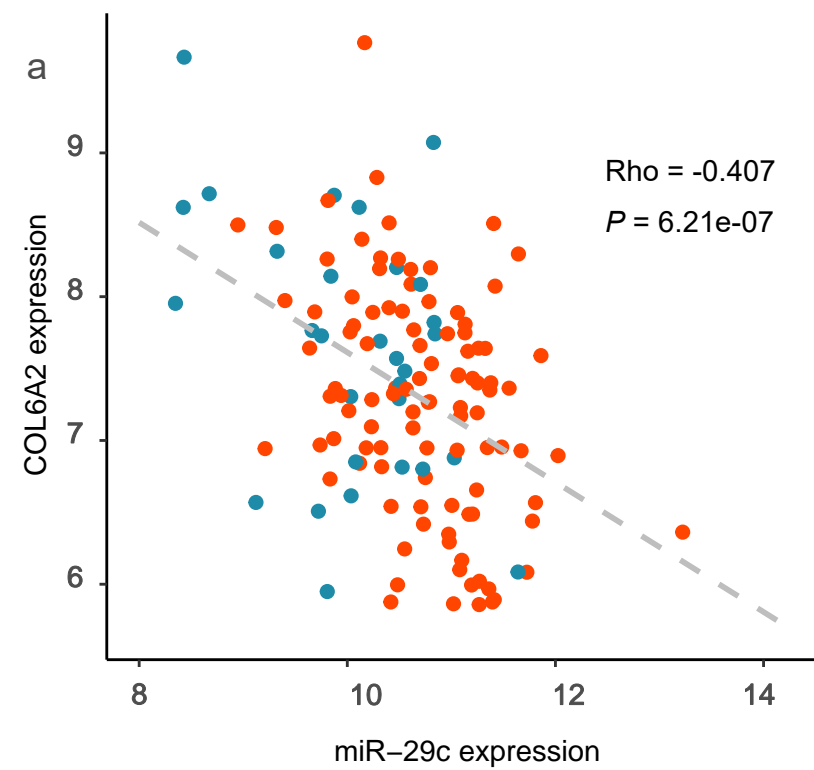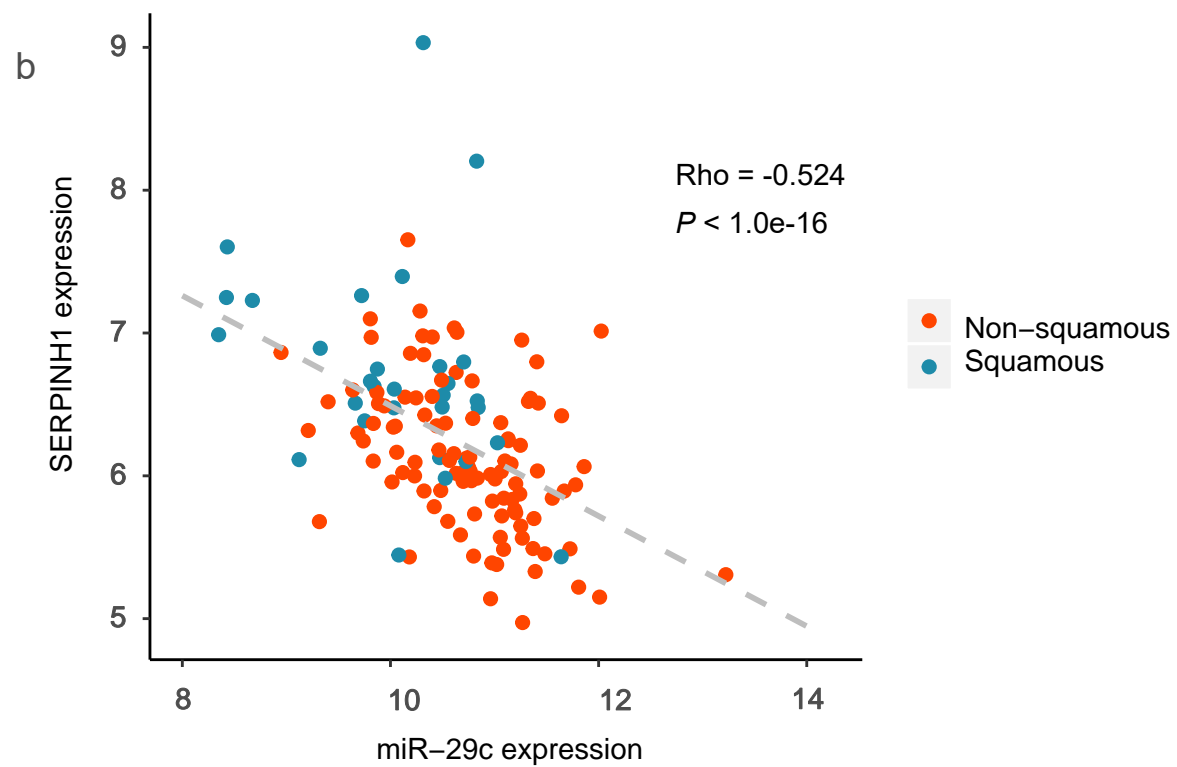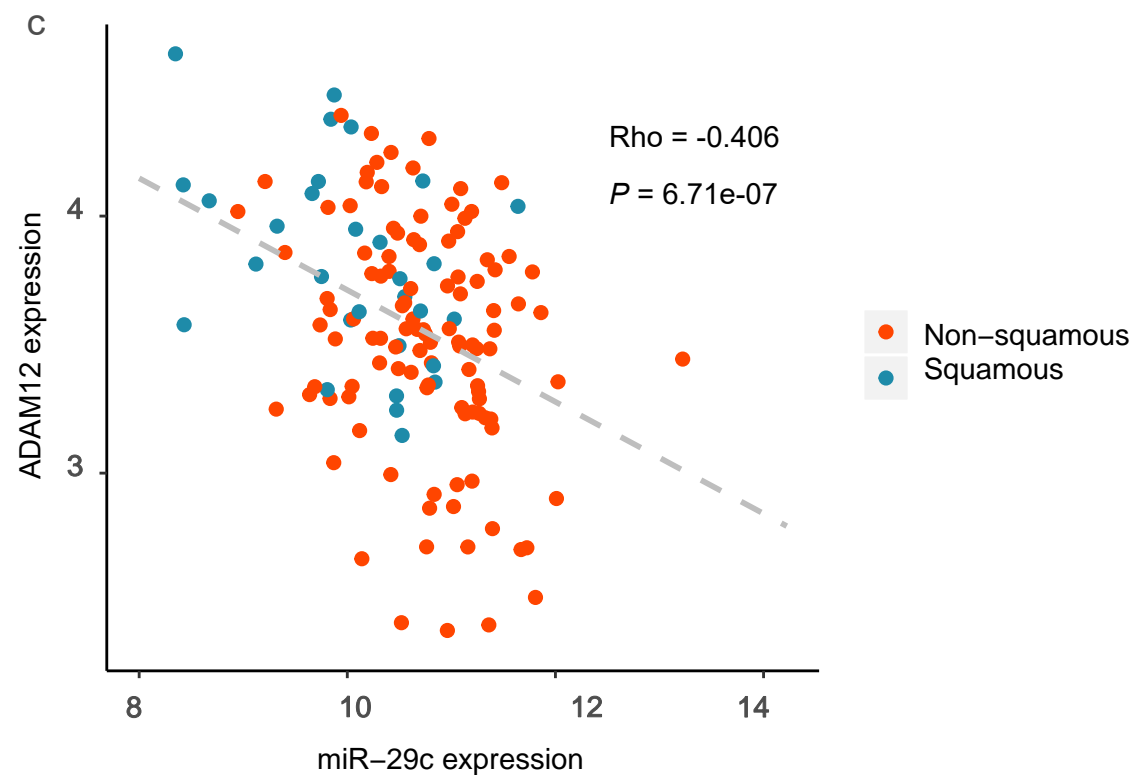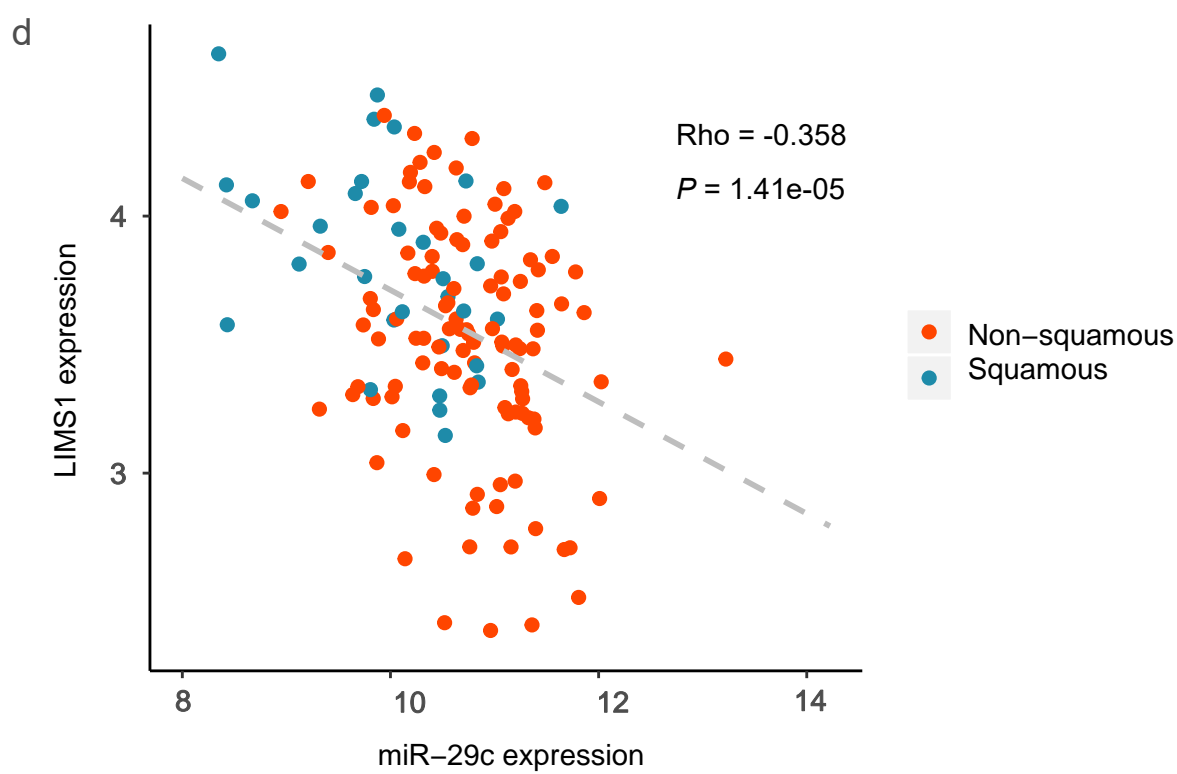

Supplement: s1 [file s1]

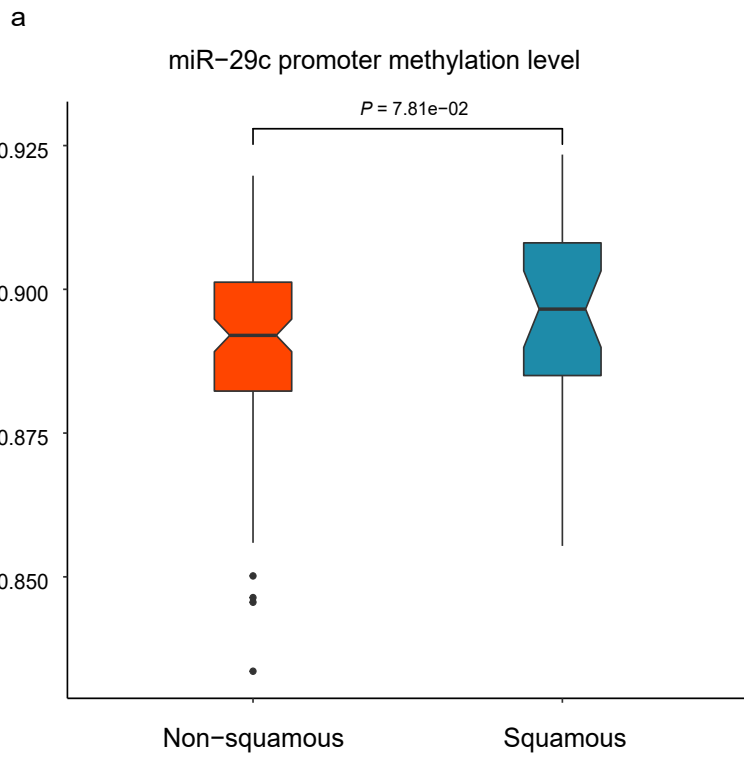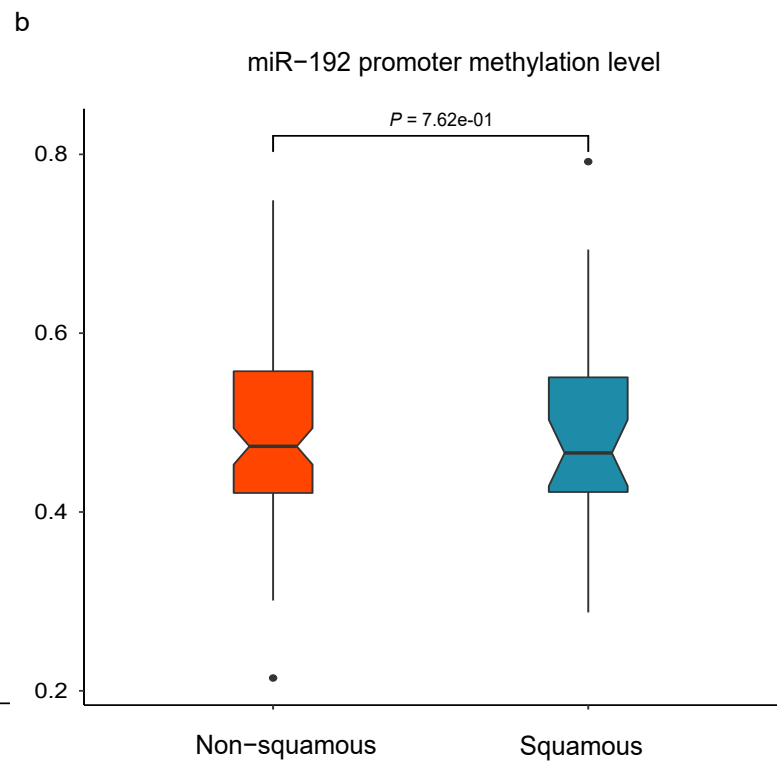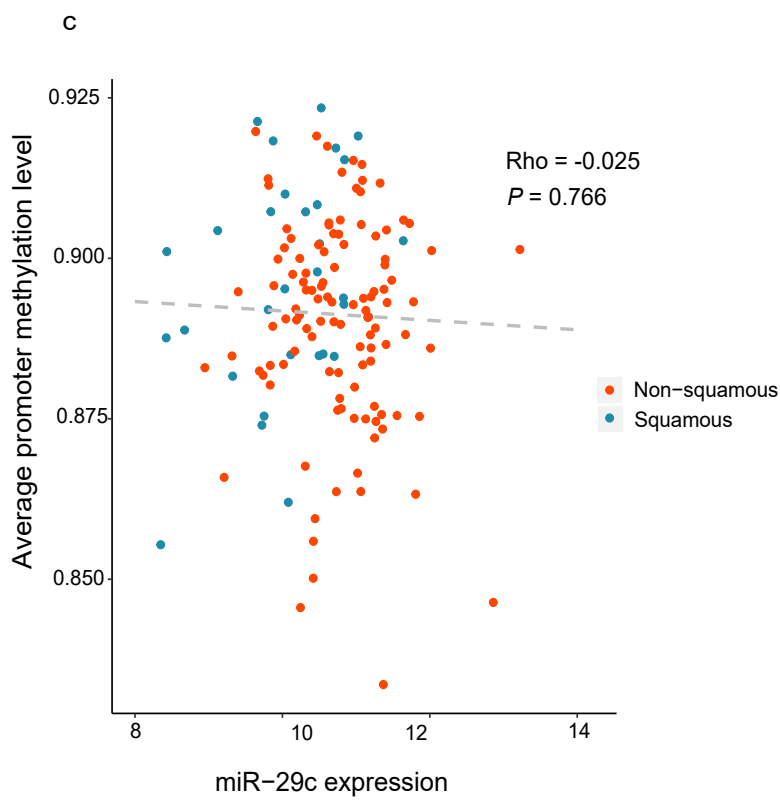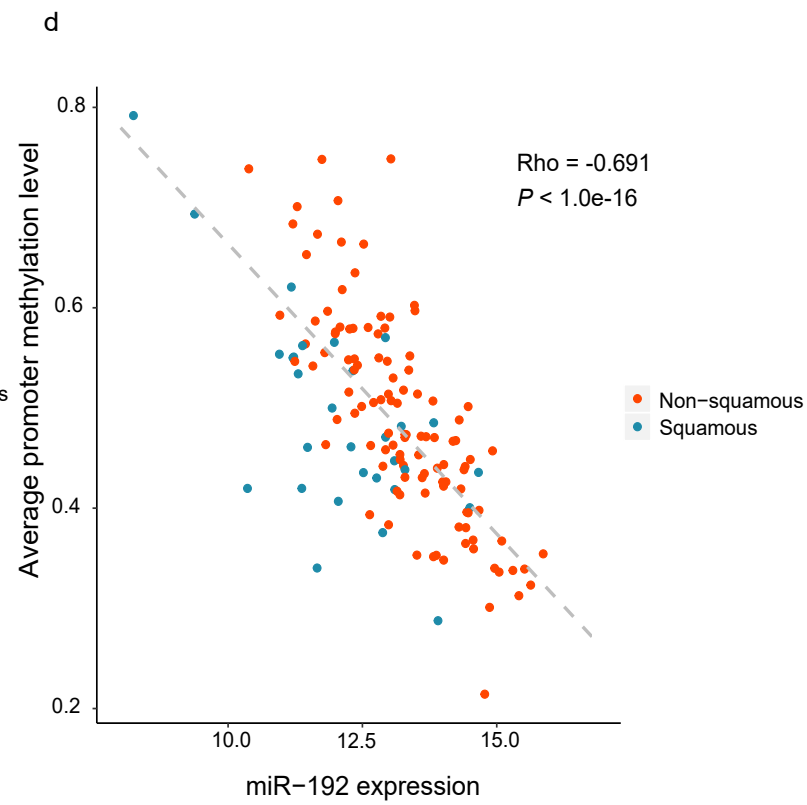

Supplement: s1 [file s1]

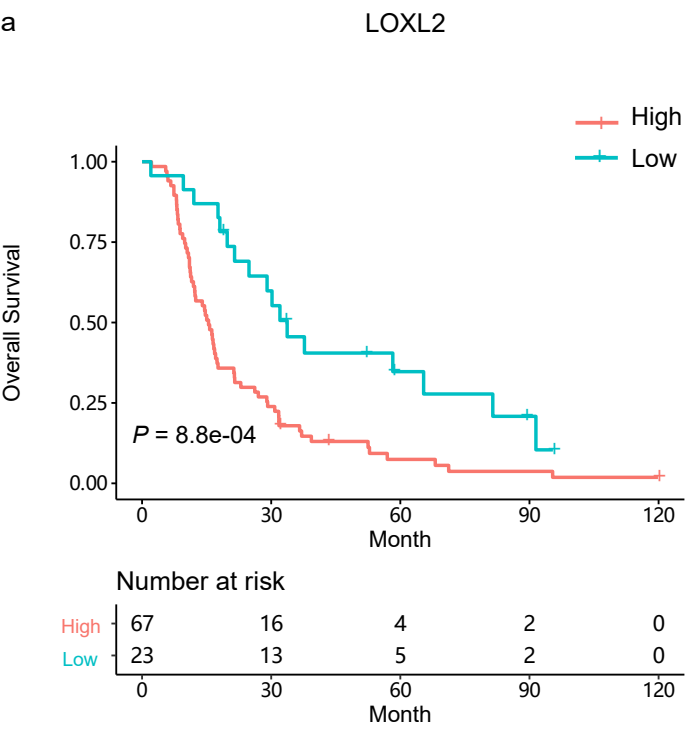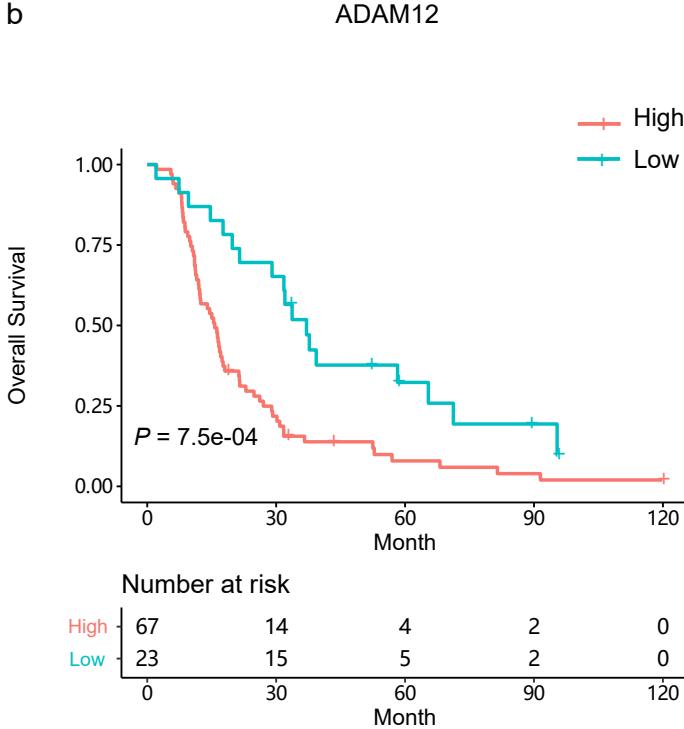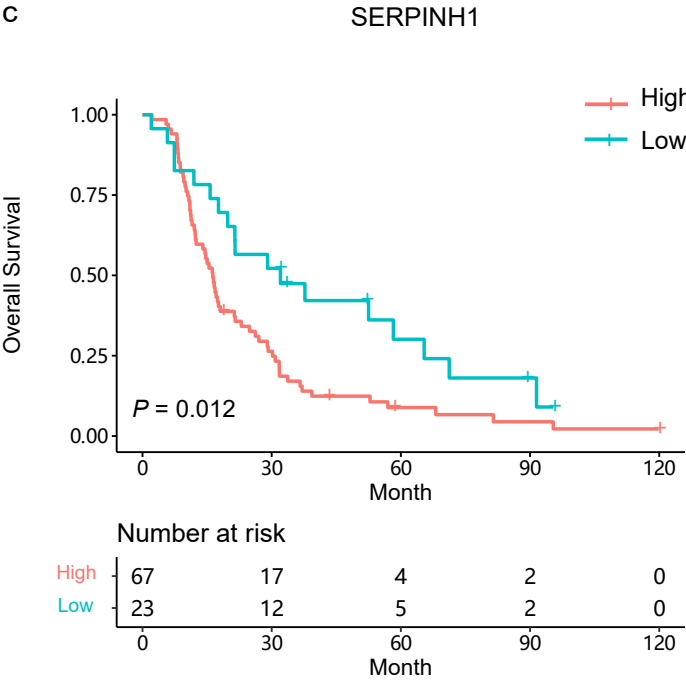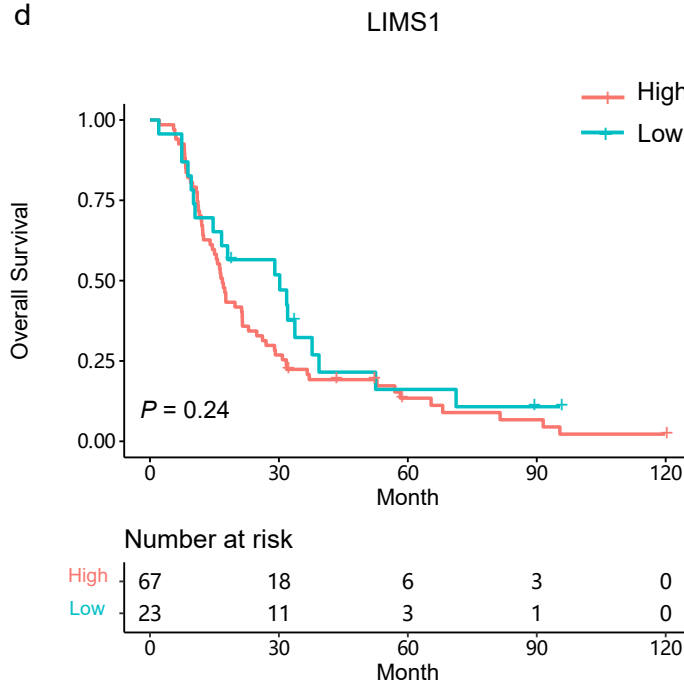

Supplement: s1 [file s1]

a

### miR-29c regulon

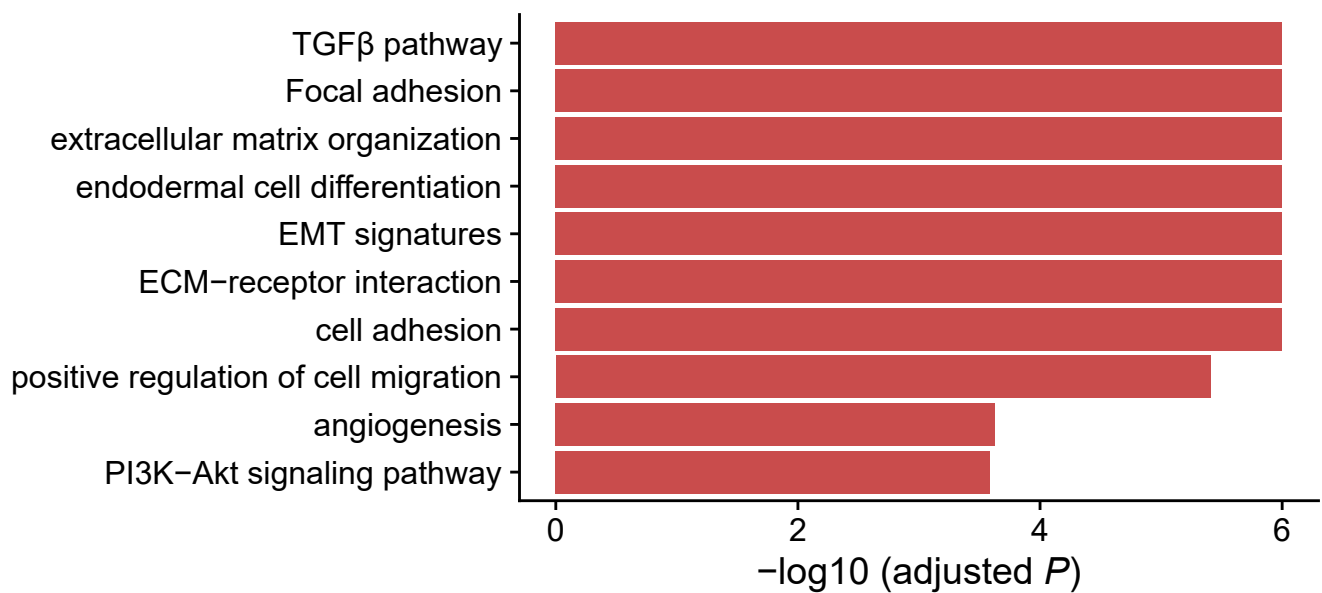

b

### miR-192 regulon

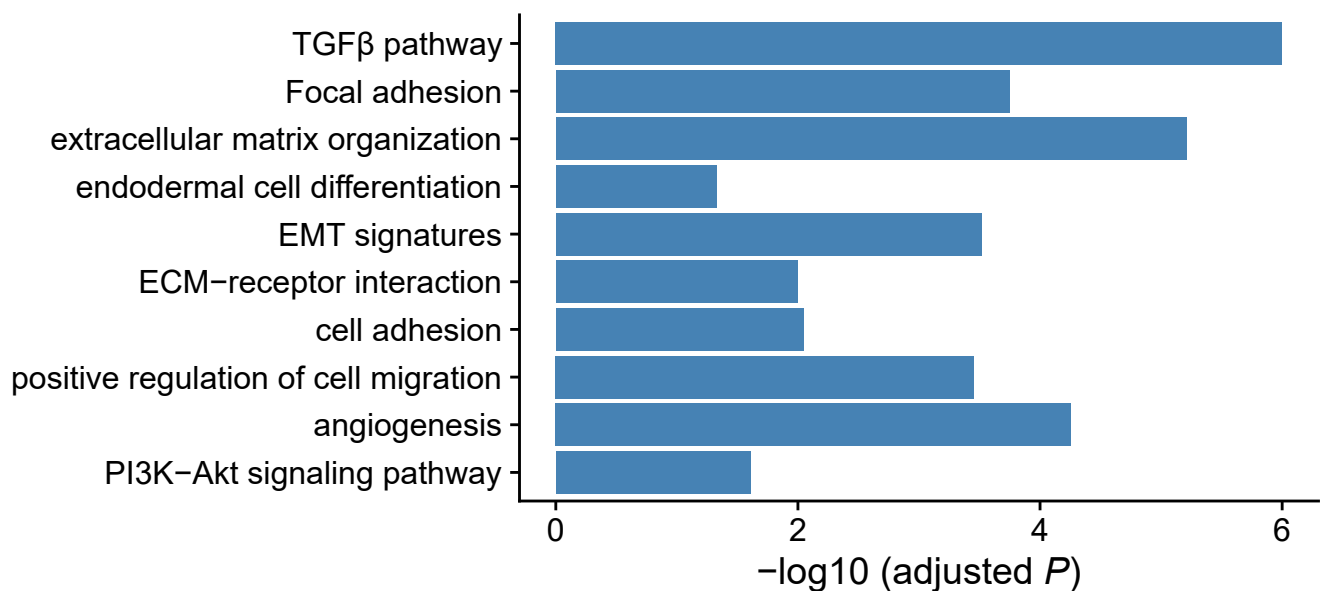

Supplement: s1 [file s1]
